# Exercise Improves Clinical Symptoms, Quality of Life, Global Functioning, and Depression in Schizophrenia: A Systematic Review and Meta-analysis

Meenakshi Dauwan<sup>\*,1,2</sup>, Marieke J. H. Begemann<sup>1</sup>, Sophie M. Heringa<sup>1</sup>, and Iris E. Sommer<sup>1</sup>

<sup>1</sup>Department of Psychiatry, Brain Center Rudolf Magnus, University Medical Center Utrecht, Utrecht, The Netherlands; <sup>2</sup>Department of Clinical Neurophysiology and MEG Center, Neuroscience Campus, VU University Medical Center, Amsterdam, The Netherlands

\*To whom correspondence should be addressed; University Medical Center Utrecht, Postbus 85500, 3508 GA Utrecht, The Netherlands; tel: 31-8-8755-7468, e-mail: [m.dauwan-3@umcutrecht.nl](mailto:m.dauwan-3@umcutrecht.nl)

**Background:** Physical exercise may be valuable for patients with schizophrenia spectrum disorders as it may have beneficial effect on clinical symptoms, quality of life and cognition. **Methods:** A systematic search was performed using PubMed (Medline), Embase, PsychInfo, and Cochrane Database of Systematic Reviews. Controlled and uncontrolled studies investigating the effect of any type of physical exercise interventions in schizophrenia spectrum disorders were included. Outcome measures were clinical symptoms, quality of life, global functioning, depression or cognition. Meta-analyses were performed using Comprehensive Meta-Analysis software. A random effects model was used to compute overall weighted effect sizes in Hedges'  $g$ . **Results:** Twenty-nine studies were included, examining 1109 patients. Exercise was superior to control conditions in improving total symptom severity ( $k = 14$ ,  $n = 719$ : Hedges'  $g = .39$ ,  $P < .001$ ), positive ( $k = 15$ ,  $n = 715$ : Hedges'  $g = .32$ ,  $P < .01$ ), negative ( $k = 18$ ,  $n = 854$ : Hedges'  $g = .49$ ,  $P < .001$ ), and general ( $k = 10$ ,  $n = 475$ : Hedges'  $g = .27$ ,  $P < .05$ ) symptoms, quality of life ( $k = 11$ ,  $n = 770$ : Hedges'  $g = .55$ ,  $P < .001$ ), global functioning ( $k = 5$ ,  $n = 342$ : Hedges'  $g = .32$ ,  $P < .01$ ), and depressive symptoms ( $k = 7$ ,  $n = 337$ : Hedges'  $g = .71$ ,  $P < .001$ ). Yoga, specifically, improved the cognitive subdomain long-term memory ( $k = 2$ ,  $n = 184$ : Hedges'  $g = .32$ ,  $P < .05$ ), while exercise in general or in any other form had no effect on cognition. **Conclusion:** Physical exercise is a robust add-on treatment for improving clinical symptoms, quality of life, global functioning, and depressive symptoms in patients with schizophrenia. The effect on cognition is not demonstrated, but may be present for yoga.

**Key words:** psychopathology/functioning/cognition/yoga/aerobic exercise

## Introduction

Schizophrenia, a severe psychiatric disorder, affects approximately 24 million people worldwide.<sup>1</sup> This

disorder is characterized by (1) positive symptoms such as hallucinations and delusions, (2) negative symptoms including affective flattening, avolition and anhedonia, and (3) neurocognitive deficits including perception, memory, and attention, among others.<sup>2</sup> Negative and cognitive symptoms, emerging in the pre-psychotic stage, appear to be related.<sup>3</sup> Higher negative and cognitive symptoms are significantly associated with poorer functional outcome.<sup>4,5</sup> Treatment with antipsychotic drugs, applied as first line therapy, typically result in reduction in positive symptoms with minimal to no effects on negative and cognitive symptoms.<sup>6</sup> In addition, antipsychotics result in the side effects weight gain and metabolic syndrome.<sup>7,8</sup> Furthermore, reduced physical capacity in patients with schizophrenia is strongly related to negative and cognitive symptoms.<sup>9,10</sup> These risk factors are major contributors of cardiovascular diseases in schizophrenia which in turn is associated with 2- to 3-fold higher mortality rate compared to the general population.<sup>11</sup> Saha et al found an all-cause standardized mortality ratio of 2.58 showing an increase in mortality in these patients over the last decades.<sup>12</sup> Therefore, it is time to implement a therapy for patients with schizophrenia that decreases the negative symptoms and cognitive deficits, and also improves the functional and clinical outcome.

Physical inactivity has been described as the leading risk factor for global mortality.<sup>13</sup> The World Health Organization (WHO) 2009<sup>14</sup> reported that physical inactivity accounts for 27% of diabetes and 30% of ischemic heart diseases, whereas an active lifestyle reduces these risks, largely improving general health and wellness, and life expectancy.<sup>14</sup> Furthermore, physical activity in healthy aging populations is associated with improvement in cognitive functioning and depressive symptoms, delay in age-related cognitive decline and neurodegeneration.<sup>15,16</sup> On the brain level, exercise induces neurogenesis, modulates synaptic plasticity and increases several growth factors

relevant for maintaining optimal brain function.<sup>17</sup> Animal studies have shown that exercise results in increased neurogenesis in the hippocampus and that this is associated with enhanced synaptic plasticity.<sup>15,16,18</sup> Basically, these effects are mediated via the exercise-related increase of several growth factors in the brain such as brain-derived neurotrophic factor (BDNF).<sup>15,18,19</sup> In schizophrenia, lower peripheral BDNF has been associated with poorer neurocognitive functioning and smaller hippocampal volumes.<sup>19,20</sup> Exercise has also been associated with changes in regional brain volume and integrity.<sup>18</sup> These exercise-induced effects on the brain have been replicated in healthy humans and clinical populations, such as dementia patients, showing increased brain volume in grey and white matter regions, increased white matter integrity in frontal and temporal lobes, increases in BDNF, reduction in depressive symptoms, and improvement in cognitive functioning in young and old.<sup>21–31</sup>

Thus, negative symptoms in schizophrenia are an important predictor of unfavorable disease course and outcome and are related to physical inactivity. Therefore, stimulating physical exercise in patients with schizophrenia might have beneficial effect on clinical symptoms. The aim of the present study was to quantitatively review the effects of physical exercise on clinical symptoms in patients with schizophrenia spectrum disorder. Secondarily, the impact of exercise on quality of life (QoL), global functioning, depression, and cognition was investigated.

## Methods

### Literature Search

This meta-analysis was performed according the Preferred Reporting for Systematic Reviews and Meta-analysis (PRISMA) Statement.<sup>32</sup> A systematic search was performed in the databases Pubmed (Medline), Embase, PsychInfo and Cochrane Database of Systematic Reviews (independently by M.D. and I.E.S.). Combinations of the following search terms were used: “schizophrenia,” “schizoaffective,” “schizophreniform,” “psychosis,” “psychotic,” “exercise,” “soccer,” “physical,” “training,” “endurance,” “aerobic,” “sport,” and “yoga” ([supplementary table S1](#)). The search cut-off date was July 31, 2015. Additionally, the reference lists of the retrieved articles were examined for cross-references. When necessary, corresponding authors were contacted to provide full text details of the study outcome measures. In case the full text of articles was not available and the corresponding information of the authors was not traceable, the abstract was used to retrieve the necessary information to avoid publication bias. There were no year or language limits.

### Inclusion Criteria

By consensus (between M.D. and I.E.S.), studies meeting the following inclusion criteria were included:

1. Studies investigated the effect of any type of exercise as an intervention on psychiatric symptoms, QoL or global functioning, depressive symptoms or cognition. Both controlled and uncontrolled studies were included.
2. Studies including patients with a diagnosis of schizophrenia or schizophrenia spectrum disorder (schizophreniform, schizoaffective, delusional or psychotic disorder not otherwise specified) according to the diagnostic criteria of the *Diagnostic and Statistical Manual of mental Disorders*<sup>2</sup> (DSM-III, DSM-III-R, DSM-IV, DSM-IV-TR), or the International Classification of Diseases-9 or 10.
3. Studies reported sufficient information to compute common effect size statistics (ie, mean and SD, exact *P*-, *t*-, or *z*-values) or corresponding authors provided these data upon request.

Studies using combined programs of weight reduction and exercise or using additional cognitive training besides exercise were included in order to obtain as much information as possible.

### Exclusion Criteria

1. Studies investigating the effect of exercise on the outcome measures in an uncontrolled study or in a mixed population of patients with schizophrenia and any other psychiatric disorder were excluded from the meta-analyses.
2. Studies that only measured an outcome in the intervention group and not in a control group were excluded from the analysis of the specific outcome measure.

Studies that were excluded from the meta-analyses based on these criteria were, however, included in the descriptive ([supplementary table S2](#)) and methodological assessment of quality table of the study ([supplementary table S3](#)). The outcomes of these studies are reported separately ([supplementary table S4](#)).

### Outcome Measures

The primary outcome measures were the standardized mean difference in clinical symptoms, measured by total scores on the Positive and Negative Syndrome Scale (PANSS)<sup>33</sup> or the Brief Psychiatric rating Scale (BPRS),<sup>34</sup> standardized mean difference in general, positive and negative symptom subscores of the PANSS or scores on the Scale for the Assessment of Positive Symptoms (SAPS),<sup>35</sup> or the Scale for the Assessment of Negative Symptoms (SANS).<sup>36</sup> Secondary outcome measures included QoL and depressive symptoms as assessed by various QoL and depression questionnaires, global, social and occupational functioning assessed by Global Assessment of Functioning scale (GAF)<sup>37</sup> and Social and occupational Functioning (Assessment) Scale (SOFAS/SOFS),<sup>38</sup> and mean change in cognitive domains.

### Statistical Analysis

Data were pooled for all studies examining the effect of exercise on a specific outcome measure. Since the follow-up period of the included studies differed and some studies had more than 1 follow-up moment, the last follow-up moment of the study was used. For studies that added cognitive training to their program a few weeks after the start of the study, the last follow-up moment before the addition was used to investigate only the effect of exercise. In order to study the effect of the moderating variables type of exercise and type of control condition, studies were reclassified based on the type of exercise and type of control condition. Types of exercises were reclassified into 3 major domains: aerobic (eg, endurance training, cardiovascular exercises, treadmill walking), anaerobic (muscle strength training), and yoga. Studies using an aerobic exercise program but including anaerobic exercises to provide variation were classified as aerobic with an annotation of anaerobic training. Types of control conditions were reclassified into active (eg, schizophrenia patients playing table football, computer games or following occupational therapy) or passive (eg, healthy controls, schizophrenia patients included as waiting list or treatment as usual). See descriptive table for further details (supplementary table S2). When possible, moderator analyses for type of exercise and type of control condition were performed. For exercise, only aerobic and yoga exercise were compared because an insufficient number of studies examined the effect of only anaerobic exercise. Effect sizes were computed using Comprehensive Meta Analysis Version 2.0.<sup>39</sup> Per outcome measure, the magnitude and direction of effect was calculated for each individual study. Since most studies reported pre-exercise and post-exercise means and standard deviations, these values were used to compute the effect sizes. When possible, change scores were used instead of pre- and post-exercise scores in order to avoid overestimation of the true effect size because of pre-post intervention correlation. When means and standard deviations or change scores were not available, effect sizes were computed using exact  $P$ - or  $t$ -values. Hedges'  $g$  was used to quantify effect sizes of combined studies using a random effects model. A random effects model was used because of the variances in type and duration of applied exercise between studies, total duration of the study, and the limited number of studies for some outcome measures. Moreover, a random effects model allows generalization of the results on population level.<sup>40</sup> First, analyses were performed including all suitable studies per outcome measure. Subsequently, analyses were repeated by excluding outlier studies, defined as studies with an effect size that deviated more than 2 SDs from the mean weighted effect size.<sup>41</sup> Effect sizes with a  $P$ -value of  $<.05$  were considered significant.

Furthermore, heterogeneity of results across studies was assessed by calculating the homogeneity statistic,  $I^2$ .  $I^2$

describes the percentage of total variation across studies due to heterogeneity rather than chance. High heterogeneity (ie,  $I^2 \geq 50\%$ ) makes interpretation of results unreliable.<sup>42</sup> Potential publication bias was first investigated by visual inspection of the funnel plots. An asymmetrical funnel plot indicates publication bias. Afterwards, the funnel plot asymmetry was tested with Egger's test with alpha of  $<.05$  set as significance level (2-tailed).<sup>43</sup>

### Results

The literature search yielded 61 quantitative studies (supplementary figure S1) that investigated the effect of any type of exercise on the outcome measures (supplementary table S2).<sup>44–105</sup> From these, 29 studies, investigating 1109 patients, were suitable to be included in the meta-analyses. The assessed methodological quality of all retrieved studies is shown in supplementary table S3.

#### Primary Outcome Measure: Clinical Symptoms

Fourteen studies, including 659 patients, examined the effect of exercise on total symptom severity (table 1).<sup>56,61,62,64–66,75,76,85,90,94,96,99,101</sup> Exercise showed a superior effect over active controls (8 studies,  $N = 314$ : Hedges'  $g = .25$ ,  $P < .05$ ), passive controls (8 studies,  $N = 405$ : Hedges'  $g = .75$ ,  $P < .001$ ), and an overall significant effect ( $N = 719$ : Hedges'  $g = .39$ ,  $P < .001$ ; figure 1) in reducing total symptom severity. Heterogeneity was high ( $I^2 = 61\%$ ). The study by Visceglia et al<sup>96</sup> was considered an outlier (Hedges'  $g = 2.08$ ) and excluded from the analysis. After exclusion, the overall (Hedges'  $g = .37$ ,  $P < .001$ , table 1), and moderator based mean weighted effect sizes remained significant (active: Hedges'  $g = .25$ ,  $P < .05$ ; passive: Hedges'  $g = .65$ ,  $P < .001$ ). The effect size for comparison with passive and overall control group decreased slightly. The degree of heterogeneity among studies decreased, but remained high ( $I^2 = 54\%$ ; table 1). Egger's test before and after excluding the outlier was nonsignificant indicating no publication bias.

The analysis of positive symptoms included 15 studies with a total of 641 patients (table 1).<sup>45,50,56,61,65,66,74–76,79,85,90,94,96,101</sup> Exercise was superior to active (9 studies,  $N = 365$ : Hedges'  $g = .27$ ,  $P < .05$ ), passive (9 studies,  $N = 350$ : Hedges'  $g = .50$ ,  $P < .05$ ), and overall controls in reducing positive symptoms ( $N = 715$ : Hedges'  $g = .32$ ,  $P < .01$ ; figure 2). Heterogeneity was high ( $I^2 = 50\%$ , table 1). No outliers were found. Egger's test was nonsignificant.

Regarding negative symptom scores, 18 studies could be retrieved, including a total of 765 patients (table 1).<sup>45,50,56,59,61,65,66,74–76,79,85,90,92,94,96,101,102</sup> Again, exercise turned out to be superior over active (10 studies,  $N = 395$ : Hedges'  $g = .33$ ,  $P < .01$ ), passive (12 studies,  $N = 459$ : Hedges'  $g = .89$ ,  $P < .001$ ), and overall controls in improving negative symptoms ( $N = 854$ : Hedges'  $g = .49$ ,  $P < .001$ ; figure 3). Heterogeneity among studies

**Table 1.** Overview Results for All Outcome Measures Showing Effect Size, 95% Confidence Interval, *P*-Value, and *I*<sup>2</sup>

| Outcome Measure                     | Studies (N) | Subjects/Patients (N) <sup>a</sup> | Hedges' <i>g</i> | 95% CI           | <i>P</i> Value | <i>I</i> <sup>2</sup> (%) |
|-------------------------------------|-------------|------------------------------------|------------------|------------------|----------------|---------------------------|
| <b>PANSS</b>                        |             |                                    |                  |                  |                |                           |
| Total                               | 14          | 659/659                            | .39              | 0.19–0.58        | <.001          | 61                        |
| Total without outlier               | 13          | 641/641                            | .37              | 0.18–0.57        | <.001          | 54                        |
| Positive                            | 15          | 641/641                            | .32              | 0.14–0.50        | <.01           | 50                        |
| Negative                            | 18          | 765/765                            | <b>.49</b>       | <b>0.31–0.67</b> | <.001          | <b>60</b>                 |
| Negative without outlier            | 18          | 750/750                            | <b>.49</b>       | <b>0.33–0.66</b> | <.001          | <b>47</b>                 |
| General                             | 10          | 436/436                            | <b>.27</b>       | <b>0.04–0.50</b> | <.05           | <b>58</b>                 |
| <b>Quality of life</b>              |             |                                    |                  |                  |                |                           |
| Total                               | 11          | 277/277                            | <b>.55</b>       | <b>0.35–0.76</b> | <.001          | <b>49</b>                 |
| Total without outlier               | 10          | 259/259                            | <b>.47</b>       | <b>0.30–0.64</b> | <.001          | <b>29</b>                 |
| QoL physical                        | 9           | 238/238                            | <b>.50</b>       | <b>0.11–0.89</b> | <.05           | <b>63</b>                 |
| QoL physical without outlier        | 8           | 220/220                            | <b>.39</b>       | <b>0.05–0.73</b> | <.05           | <b>41</b>                 |
| QoL mental                          | 9           | 197/197                            | .38              | –0.06–0.82       | .09            | 65                        |
| QoL mental without outlier          | 8           | 179/179                            | .33              | –0.07–0.72       | .10            | 47                        |
| QoL social                          | 5           | 139/139                            | <b>.67</b>       | <b>0.34–1.00</b> | <.001          | <b>0</b>                  |
| QoL environmental                   | 4           | 108/108                            | <b>.62</b>       | <b>0.24–1.00</b> | <.01           | <b>0</b>                  |
| Functioning                         | 5           | 276/276                            | <b>.32</b>       | <b>0.11–0.53</b> | <.01           | <b>0</b>                  |
| Depression                          | 7           | 316/296                            | <b>.71</b>       | <b>0.33–1.09</b> | <.001          | <b>79</b>                 |
| Depression without outlier          | 6           | 277/257                            | <b>.64</b>       | <b>0.27–1.02</b> | <.01           | <b>70</b>                 |
| <b>Cognition</b>                    |             |                                    |                  |                  |                |                           |
| Working memory                      | 6           | 262/192                            | .23              | –0.04–0.50       | .09            | 49                        |
| Long-term memory                    | 6           | 262/233                            | .14              | –0.07–0.35       | .19            | 14                        |
| Processing speed                    | 4           | 201/180                            | .15              | –0.10–0.40       | .24            | 0                         |
| Attention and executive functioning | 4           | 209/188                            | .07              | –0.17–0.32       | .55            | 59                        |

Note: <sup>a</sup>Total number of subjects (patients in exercise group + control group with or without schizophrenia) / only number of schizophrenia patients (in exercise and control group). Bold values indicate significant effect sizes.

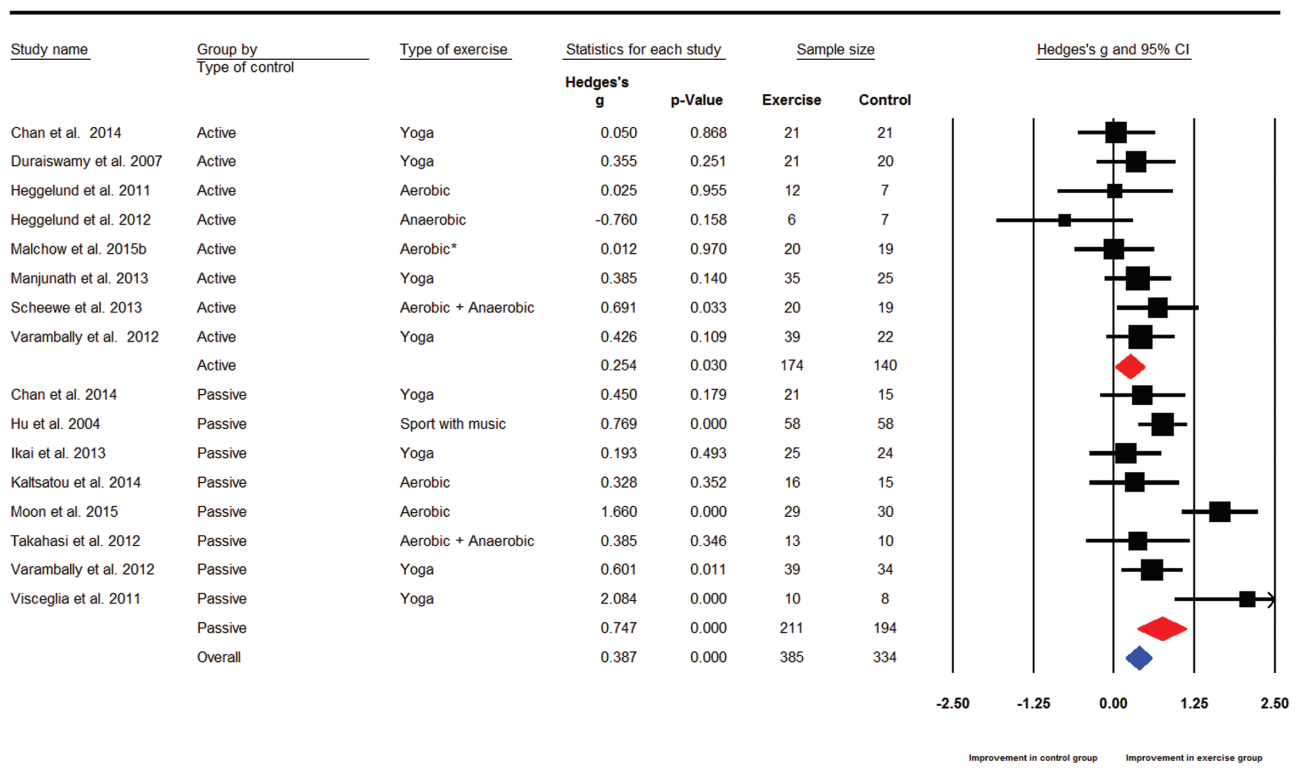

**Fig. 1.** Meta-analysis of the effect of exercise on total symptom severity. Effect sizes are grouped by the type of control patients as included in the individual studies. \*With additional cognitive training.



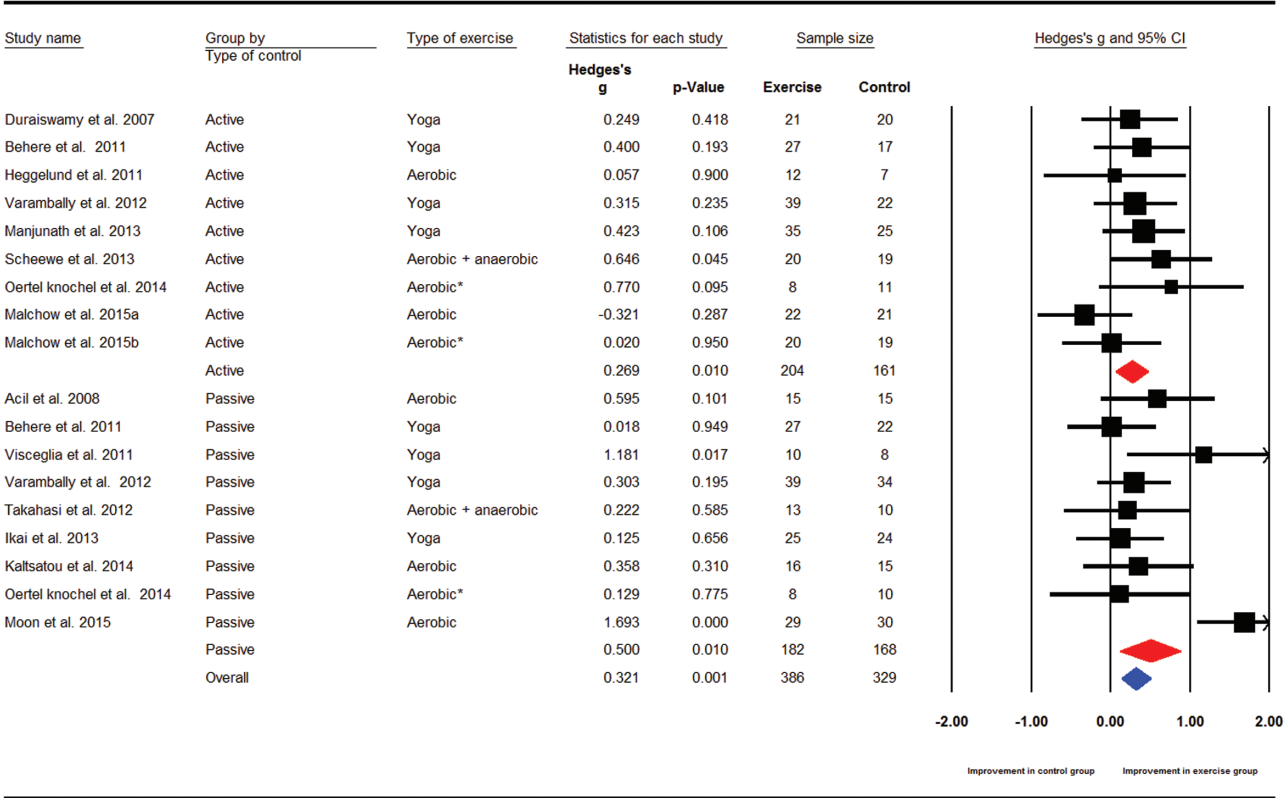

**Fig. 2.** Meta-analysis of the effect of exercise on positive symptoms. Effect sizes are grouped by the type of control patients as included in the individual studies. \*With additional cognitive training

was high ( $I^2 = 60\%$ ). The study by Gholipour et al<sup>59</sup> was considered an outlier (Hedges'  $g = 2.40$ ). After removal, the effect size and significance level for the active control group and overall analysis remained unchanged. Effect size for the effect of exercise over passive control group decreased slightly with unchanged significance (Hedges'  $g = .77$ ,  $P < .001$ ). Heterogeneity among studies declined to moderate ( $I^2 = 47\%$ ). Egger's test remained nonsignificant before and after exclusion of the outlier.

Concerning general symptom severity, the meta-analysis, including 10 studies with 436 patients studied,<sup>61,65,66,74-76,90,94,96,101</sup> showed an overall significant efficacy of exercise to controls in reducing general symptom severity. Heterogeneity was considered high ( $N = 475$ : Hedges'  $g = .27$ ,  $P < .05$ ,  $I^2 = 58\%$ ; [figure 4](#); [table 1](#)). The moderator analysis showed a superior effect of exercise compared to passive controls (6 studies,  $N = 253$ : Hedges'  $g = .64$ ,  $P < .01$ ), whereas no significant difference was found between exercise and active controls (5 studies,  $N = 222$ : Hedges'  $g = .16$ ,  $P = .24$ ). Egger's test showed no evidence for publication bias.

Additional moderator analyses for the type of exercise showed that both yoga and aerobic exercise were effective in reducing the total symptom severity (yoga: Hedges'  $g = .44$ ,  $P < .01$ ; aerobic: Hedges'  $g = .59$ ,  $P < .01$ ; [supplementary figure S2](#); [supplementary table S5](#)), and positive symptoms (yoga: Hedges'  $g = .31$ ,  $P < .01$ ; aerobic:

Hedges'  $g = .43$ ,  $P < .05$ ; [supplementary figure S3](#); [supplementary table S5](#)). The significance of the effect sizes for total symptom severity remained unaffected after exclusion of the outlier study by Visceglia ([supplementary table S5](#)).<sup>96</sup> In addition, both yoga and aerobic exercise were comparable in reducing negative symptoms (yoga: Hedges'  $g = .46$ ,  $P < .001$ ; aerobic: Hedges'  $g = .42$ ,  $P < .05$ ; [supplementary figure S4](#); [supplementary table S5](#)). Finally, yoga showed significant effect in reducing general symptoms, whereas aerobic exercise was nonsignificant (yoga: Hedges'  $g = .44$ ,  $P < .05$ ; aerobic: Hedges'  $g = .39$ ,  $p = .14$ ; [supplementary figure S5](#); [supplementary table S5](#)).

Secondary Outcome Measures

Exercise turned out to be superior in improving QoL (Hedges'  $g = .55$ ,  $P < .001$ ; [supplementary figure S6](#)), global functioning (Hedges'  $g = .32$ ,  $P < .01$ ; [supplementary figure S12](#)), and reducing depression (Hedges'  $g = .71$ ,  $P < .001$ ; [supplementary figure S14](#)). In the overall analysis, exercise was not superior to control conditions in improving any of the cognitive subdomains (Attention & executive functioning: Hedges'  $g = .07$ ,  $P = .55$ ; Processing speed: Hedges'  $g = .15$ ,  $P = .24$ ; Working memory: Hedges'  $g = .23$ ,  $P = .09$ ; Long-term memory: Hedges'  $g = .14$ ,  $P = .19$ ; [supplementary figure S16-S19](#)). However, moderator analyses for the type of exercise revealed a significant

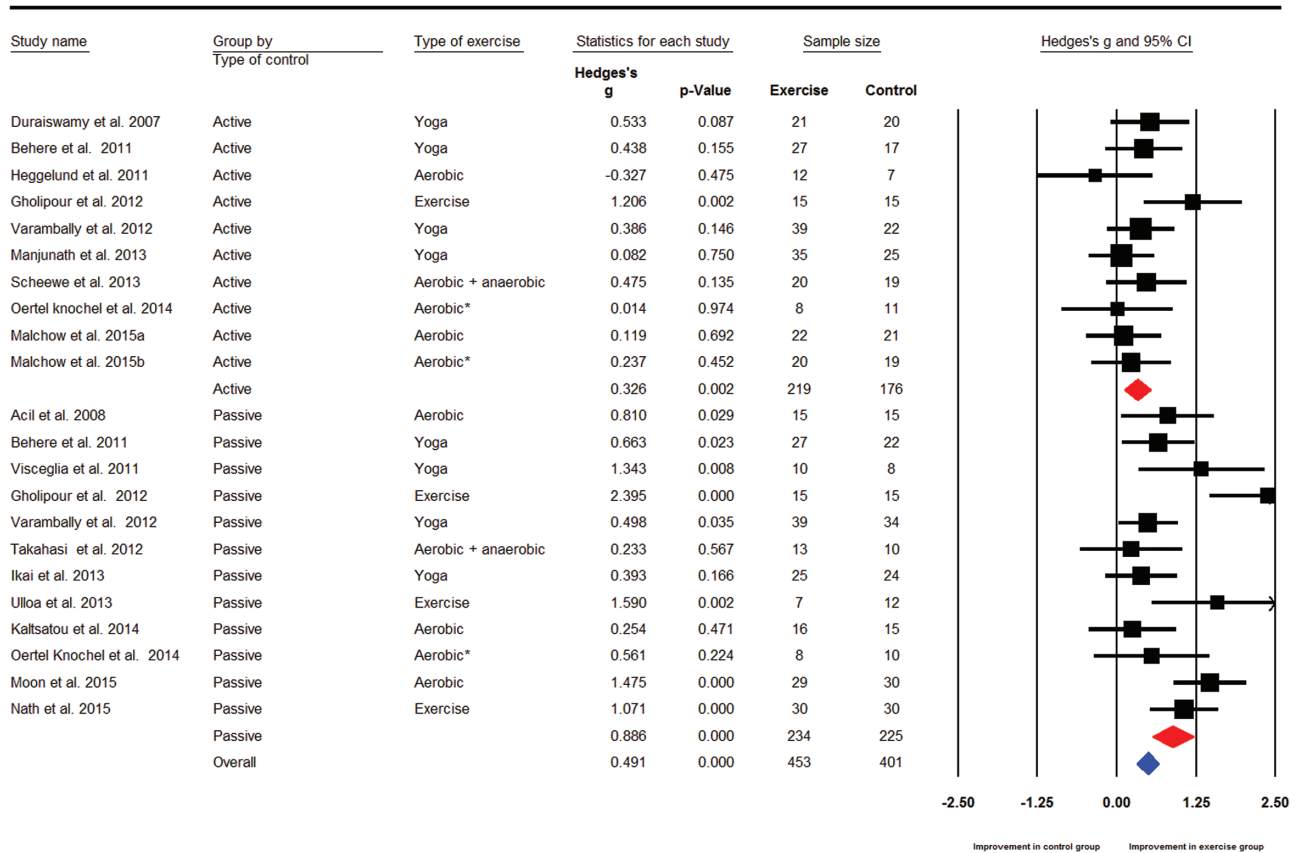

**Fig. 3.** Meta-analysis of the effect of exercise on negative symptoms. Effect sizes are grouped by the type of control patients as included in the individual studies. \*With additional cognitive training.

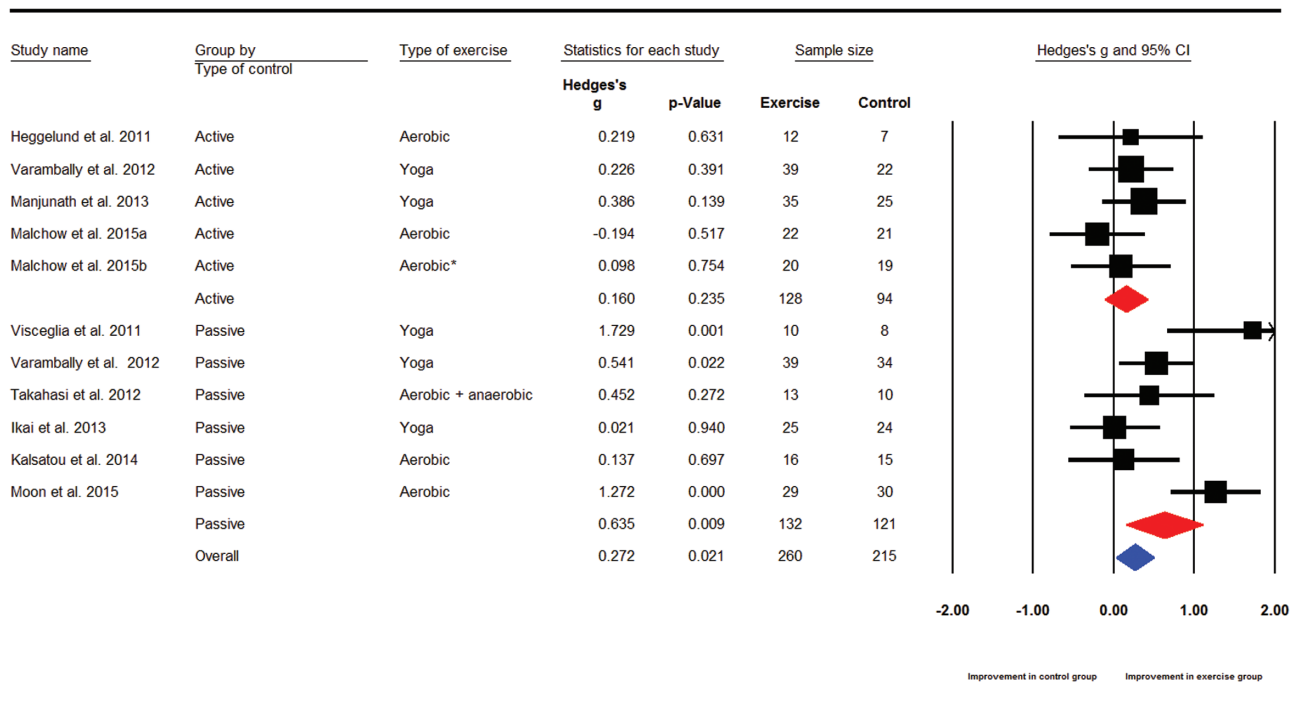

**Fig. 4.** Meta-analysis of the effect of exercise on general symptoms. Effect sizes are grouped by the type of control patients as included in the individual studies. \* With additional cognitive training.

effect of yoga in improving the cognitive subdomain long-term memory (Hedges'  $g = .32$ ,  $P < .05$ ; [supplementary figure S20](#); [supplementary table S5](#)).

Detailed results on the secondary outcome measures are shown in the [supplementary materail](#).

## Discussion

The aim of this study was to quantitatively review all available controlled trials on the efficacy of physical exercise in patients with a schizophrenia spectrum disorder. Twenty-nine studies, providing data on 1109 patients, were included in the analyses. Results showed an overall significant effect of exercise on clinical symptoms with medium effect sizes for total and negative symptoms, and small effect sizes for general and positive symptoms. Interestingly, only yoga showed significance in improving general symptoms, while both yoga and aerobic exercise were effective in reducing the total symptom severity, and positive and negative symptoms. In addition, both yoga and aerobic exercise showed a similar effect in improving QoL. Furthermore, exercise was beneficial in improving global functioning and depressive symptoms. Notably, evidence points more towards the beneficial effect of yoga in improving global functioning, and reducing depressive symptoms. Exercise in general showed a trend towards significance in improving the cognitive subdomain processing speed, while no effect on the other cognitive subdomains was demonstrated. However, a positive effect of yoga on the cognitive subdomain long-term memory and a trend towards significance for the subdomain attention and executive functioning were observed.

Previous work examining the contribution of psychiatric symptoms to functional outcome reveals that negative symptoms are significantly associated with functional outcome in schizophrenia,<sup>3,5,106,107</sup> while positive symptoms are less strongly correlated with functional impairment.<sup>5,108</sup> Moreover, negative symptoms are related to neurocognition and thereby also indirectly affect the outcome by mediating the relationship between neurocognition and outcome.<sup>5,108</sup> A reduction of negative symptoms in patients with schizophrenia can be achieved by participating in exercise, while antipsychotics have no effect on these symptoms.<sup>109</sup> A 2011 Cochrane review by Gorczynski and Faulkner<sup>110</sup> including 3 randomized controlled trials (RCT) found significant effect of exercise on negative symptoms, but not on positive symptoms.<sup>110</sup> However, since then many controlled studies have been conducted that provide evidence for beneficial effects of physical exercise on clinical symptoms in schizophrenia spectrum disorders.<sup>50,59,61,62,65,66,74–76,79,85,90,92,94,96,99,101,102</sup> These individual studies are included in the present meta-analyses. Therefore, the present quantitative review including 29 studies shows highly significant effect of physical exercise on both positive and negative symptoms when compared to the control situation.

## Type of Exercise

The present meta-analyses show beneficial effects of both aerobic exercise and yoga on most outcomes measured, with better results for yoga in several occasions. Physical exercise in schizophrenia reduces psychological distress and state anxiety, while yoga, specifically, has been proposed to reduce positive and negative symptoms.<sup>111</sup> Eight studies included in the meta-analyses investigated yoga. All these studies applied the same type of yoga program consisting of *asanas* (ie, postures or exercise as standing, twisting, sun salutation, balance, joint rotations), *pranayama* (ie, breathing exercises), and relaxation exercises. None of the studies included meditation teachings in their yoga program.

Besides, exercise variables such as frequency, intensity, session duration, total intervention duration, and either or not supervision is present are nontrivial factors that can shape exercise in a way that is most effective for a specific patient group. In the present study, exercise sessions ranged from 16 minutes once<sup>63</sup> to 360–720 minutes per week.<sup>90</sup> The total intervention duration ranged from 3 weeks<sup>51</sup> to 8 months,<sup>66</sup> and were shortest for studies investigating yoga. The total intervention duration in most studies was around 12 weeks. For aerobic exercise, mostly 90–120 minutes of exercise per week were devoted, which is in line with the recommended amount of time patients with schizophrenia are advised to engage in physical exercise.<sup>112</sup> Although, the American College of Sports Medicine (ACSM) recommends a moderate-intensity cardiorespiratory exercise training of 150 minutes per week in adults.<sup>113</sup> This indicates that the current exercise interventions may not be sufficient in the present patient population. However, (normally inactive) persons (eg, schizophrenia patients) can also benefit from less amounts of exercise than recommended by the ACSM.<sup>113</sup> On the other hand, almost all studies in the meta-analyses made use of group exercise under supervision as is also recommended by the ACSM.<sup>113</sup> Group exercises are cost-effective and aid in the development of sense of relatedness.<sup>112</sup> Therefore, qualitative assessment of the present data recommends clinicians to implement supervised group exercise programs of at least 30min/day, 3 times per week for minimally 12 weeks, but to consider long-term continuation for more robust effects.

## Strengths, Limitations, and Recommendations

The greatest strength of the present study is that it provides an up-to-date, and extensive quantitative and qualitative overview of the literature regarding the efficacy of different exercise interventions in schizophrenia. A previous meta-analysis by Firth and colleagues<sup>114</sup> on the same topic as the present study showed only beneficial effect of exercise in reducing positive and negative symptoms.<sup>114</sup> However, Firth et al investigated only English peer-reviewed RCTs, and excluded studies investigating

yoga and/or combined weight reduction and exercise programs as intervention. The present study, however, included all the studies meeting these criteria and, therefore, was able to perform meta-analyses in several clinical outcome measures. Furthermore, the present study showed that the best results of exercise are seen in the yoga intervention groups. These results are one of the main differences with the study by Firth et al. Furthermore, the current study aimed to compare exercise with both active and passive types of control conditions and showed that exercise has greater efficacy in improving various outcome measures. The study by Firth et al<sup>114</sup> pooled data from studies with more than 2 non-exercise groups<sup>114</sup> and therefore couldn't compare exercise with different types of control conditions. Finally, the present study also included uncontrolled studies on exercise to provide a comprehensive qualitative overview of the results found in these studies, whereas Firth and colleagues excluded these type of studies.<sup>114</sup> These key differences with the study by Firth et al<sup>114</sup> emphasize the strength of the present results.

This study has also some limitations. First, only 6 studies could be included in the cognitive meta-analyses, so that the overall effect of exercise on cognition was underpowered and therefore not fully reliable. However, the results of the studies on cognition that could not be included also showed beneficial effect of exercise (supplementary table S4). Second, publication bias is an important possible drawback in meta-analytical studies. To take this into account, funnel plots were visually inspected and the funnel plots asymmetry was tested with Egger's test. However, none of the inspected and tested funnel plots showed asymmetry, increasing the validity of the found results. Third, an insufficient number of studies examined the effect of only anaerobic exercise, making a moderator analysis for this group not feasible. On the other hand, previous findings regarding the inefficacy of anaerobic exercise on brain functioning support its inferiority to other types of exercise.<sup>114</sup>

For future research into the efficacy of exercise in patients with schizophrenia spectrum disorders, a few methodological concerns should be taken into account. First, at least 2-arm studies should be performed instead of single-arm studies. Second, the use of an active control condition matched for time and personal contact is recommended. Blinded assessment of outcome measures, making use of standardized questionnaires and cognitive batteries are also recommendable,<sup>108</sup> applying supervised interventions to decrease drop-out rates,<sup>115</sup> and providing full data on type of exercise and associated program variables used. By this, homogeneity of studies will be increased and findings will be more robust and generalizable.

## Conclusion

Exercise in patients with schizophrenia spectrum disorders has beneficial effects on clinical symptoms, QoL, global

functioning, and depressive symptoms, with notably evidence for yoga in improving clinical symptoms, depression, and global functioning. In addition, yoga may have a positive effect on cognition, while no overall effect of exercise could be shown for cognition. Qualitative assessment of data recommends clinicians to implement supervised group exercise programs of at least 30min/day, 3 times per week for minimally 12 weeks, but to consider long-term continuation for more robust effects.

## Supplementary Material

Supplementary material (references 116–152 are cited in the supplementary material) is available at <http://schizophreniabulletin.oxfordjournals.org>.

## References

1. Abi-Dargham A. Schizophrenia: overview and dopamine dysfunction. *J Clin Psychiatry*. 2014;75:e31.
2. American Psychiatric Association. *Diagnostic and Statistical Manual of Mental Disorders, Fourth Edition (DSM-IV)*. Washington, DC: American Psychiatric Organisation; 1994.
3. Strassnig MT, Raykov T, O'Gorman C, et al. Determinants of different aspects of everyday outcome in schizophrenia: the roles of negative symptoms, cognition, and functional capacity. *Schizophr Res*. 2015;165:76–82.
4. Lepage M, Bodnar M, Bowie CR. Neurocognition: clinical and functional outcomes in schizophrenia. *Can J Psychiatry*. 2014;59:5–12.
5. Ventura J, Helleman GS, Thames AD, Koellner V, Nuechterlein KH. Symptoms as mediators of the relationship between neurocognition and functional outcome in schizophrenia: a meta-analysis. *Schizophr Res*. 2009;113:189–199.
6. Gold JM. Cognitive deficits as treatment targets in schizophrenia. *Schizophr Res*. 2004;72:21–28.
7. Friedman JI, Wallenstein S, Moshier E, et al. The effects of hypertension and body mass index on cognition in schizophrenia. *Am J Psychiatry*. 2010;167:1232–1239.
8. Goughari AS, Mazhari S, Pourrahimi AM, Sadeghi MM, Nakhaee N. Associations between components of metabolic syndrome and cognition in patients with schizophrenia. *J Psychiatr Pract*. 2015;21:190–197.
9. Vancampfort D, Knapen J, Probst M, Scheewe T, Remans S, De Hert M. A systematic review of correlates of physical activity in patients with schizophrenia. *Acta Psychiatr Scand*. 2012;125:352–362.
10. Vancampfort D, Probst M, Scheewe T, Knapen J, De Hert M. The functional exercise capacity is correlated with global functioning in patients with schizophrenia. *Acta Psychiatr Scand*. 2012;125:382–387.
11. Laursen TM, Munk-Olsen T, Vestergaard M. Life expectancy and cardiovascular mortality in persons with schizophrenia. *Curr Opin Psychiatry*. 2012;25:83–88.
12. Saha S, Chant D, McGrath J. A systematic review of mortality in schizophrenia: is the differential mortality gap worsening over time? *Arch Gen Psychiatry*. 2007;64:1123–1131.
13. Blair SN. Physical inactivity: the biggest public health problem of the 21<sup>st</sup> century. *Br J Sports Med*. 2009;43:1–2.
14. World Health Organization. Global health risks. *World Heal Organ*. 2009; 18. ISBN: 978 92 4 156387 1.



15. Cotman CW, Berchtold NC, Christie LA. Exercise builds brain health: key roles of growth factor cascades and inflammation. *Trends Neurosci.* 2007;30:464–472.
16. van Praag H. Exercise and the brain: something to chew on. *Trends Neurosci.* 2009;32:283–290.
17. van Praag H. Neurogenesis and exercise: past and future directions. *Neuromolecular Med.* 2008;10:128–140.
18. Voss MW, Vivar C, Kramer AF, van Praag H. Bridging animal and human models of exercise-induced brain plasticity. *Trends Cogn Sci.* 2013;17:525–544.
19. Ahmed AO, Mantini AM, Fridberg DJ, Buckley PF. Brain-derived neurotrophic factor (BDNF) and neurocognitive deficits in people with schizophrenia: a meta-analysis. *Psychiatry Res.* 2015;226:1–13.
20. Song X, Fan X, Li X, et al. Serum levels of BDNF, folate and homocysteine: In relation to hippocampal volume and psychopathology in drug naïve, first episode schizophrenia. *Schizophr Res.* 2014;159:51–55. doi:10.1016/j.schres.2014.07.033.
21. Smith PJ, Blumenthal JA, Hoffman BM, et al. Aerobic exercise and neurocognitive performance: a meta-analytic review of randomized controlled trials. *Psychosom Med.* 2010;72:239–252.
22. Erickson KI, Voss MW, Prakash RS, et al. Exercise training increases size of hippocampus and improves memory. *Proc Natl Acad Sci USA.* 2011;108:3017–3022.
23. Stroth S, Hille K, Spitzer M, Reinhardt R. Aerobic endurance exercise benefits memory and affect in young adults. *Neuropsychol Rehabil.* 2009;19:223–243.
24. Knaepen K, Goekint M, Heyman EM, Meeusen R. Neuroplasticity - exercise-induced response of peripheral brain-derived neurotrophic factor: a systematic review of experimental studies in human subjects. *Sports Med.* 2010;40:765–801.
25. Voss MW, Heo S, Prakash RS, et al. The influence of aerobic fitness on cerebral white matter integrity and cognitive function in older adults: results of a one-year exercise intervention. *Hum Brain Mapp.* 2013;34:2972–2985.
26. Colcombe SJ, Erickson KI, Scalf PE, et al. Aerobic exercise training increases brain volume in aging humans. *J Gerontol A Biol Sci Med Sci.* 2006;61:1166–1170.
27. Voss MW, Erickson KI, Prakash RS, et al. Neurobiological markers of exercise-related brain plasticity in older adults. *Brain Behav Immun.* 2013;28:90–99.
28. Knapen J, Vancampfort D, Moriën Y, Marchal Y. Exercise therapy improves both mental and physical health in patients with major depression. *Disabil Rehabil.* 2015;37:1490–1495.
29. Cerrillo-Urbina AJ, Garcia-Hermoso A, Sanchez-Lopez M, Pardo-Guijarro MJ, Santos Gomez JL, Martinez-Vizcaino V. The effects of physical exercise in children with attention deficit hyperactivity disorder: a systematic review and meta-analysis of randomized control trials [published online ahead of print May 18, 2015]. *Child Care Health Dev.* 2015. doi:10.1111/cch.12255.
30. Barnes JN. Exercise, cognitive function, and aging. *Adv Physiol Educ.* 2015;39:55–62.
31. Knöchel C, Oertel-Knöchel V, O'Dwyer L, et al. Cognitive and behavioural effects of physical exercise in psychiatric patients. *Prog Neurobiol.* 2012;96:46–68.
32. Moher D, Liberati A, Tetzlaff J, Altman DG; PRISMA Group. Preferred reporting items for systematic reviews and meta-analyses: the PRISMA statement. *BMJ.* 2009;339:b2535.
33. Kay SR, Fiszbein A, Opler LA. The positive and negative syndrome scale (PANSS) for schizophrenia. *Schizophr Bull.* 1987;13:261–276.
34. Overall JE, Gorham DR. The brief psychiatric rating scale. *Psychol Rep.* 1962;10:799–812.
35. Andreasen NC, Liu D, Ziebell S, Vora A, Ho BC. Relapse duration, treatment intensity, and brain tissue loss in schizophrenia: a prospective longitudinal MRI study. *Am J Psychiatry.* 2013;170:609–615.
36. Andreasen NC. Scale for the Assessment of Negative Symptoms (SANS). IA: Iowa City University; 1981.
37. Endicott J, Spitzer RL, Fleiss JL, Cohen J. The global assessment scale. A procedure for measuring overall severity of psychiatric disturbance. *Arch Gen Psychiatry.* 1976;33:766–771.
38. Saraswat N, Rao K, Subbakrishna DK, Gangadhar BN. The Social Occupational Functioning Scale (SOFs): a brief measure of functional status in persons with schizophrenia. *Schizophr Res.* 2006;81:301–309.
39. Borenstein M, Hedges L, Higgins J, Rothstein H. Comprehensive meta-analysis version 2. Englewood, NJ Biostat. 2005;104.
40. Hedges LV, Vevea JL. Fixed- and Random-Effects Models in Meta-Analysis. *Psychol Methods.* 1998;3:486–504.
41. Hedges L V, Olkin I. *Statistical Method for Meta-Analysis.* Orlando, FL: Academic Press; 2014.
42. Higgins JP, Thompson SG, Deeks JJ, Altman DG. Measuring inconsistency in meta-analyses. *BMJ.* 2003;327:557–560.
43. Egger M, Davey Smith G, Schneider M, Minder C. Bias in meta-analysis detected by a simple, graphical test. *BMJ.* 1997;315:629–634. doi:10.1136/bmj.316.7129.469.
44. Abdel-Baki A, Brazzini-Poisson V, Marois F, Letendre E, Karelis AD. Effects of aerobic interval training on metabolic complications and cardiorespiratory fitness in young adults with psychotic disorders: a pilot study. *Schizophr Res.* 2013;149:112–115.
45. Dogan S, Acil AA, Dogan S, Dogan O. The effects of physical exercises to mental state and quality of life in patients with schizophrenia. *J Psychiatr Ment Health Nurs.* 2008;15:808–815.
46. Auchus MP, Kaslow NJ. Weight lifting therapy: a preliminary report. *Psychosoc Rehabil J.* 1994;18:99.
47. Ball MP, Coons VB, Buchanan RW. A program for treating olanzapine-related weight gain. *Psychiatr Serv.* 2001;52:967–969.
48. Battaglia G, Alesi M, Inguglia M, et al. Soccer practice as an add-on treatment in the management of individuals with a diagnosis of schizophrenia. *Neuropsychiatr Dis Treat.* 2013;9:595–603.
49. Beebe LH, Tian L, Morris N, Goodwin A, Allen SS, Kuldau J. Effects of exercise on mental and physical health parameters of persons with schizophrenia. *Issues Ment Health Nurs.* 2005;26:661–676.
50. Behere RV, Arasappa R, Jagannathan A, et al. Effect of yoga therapy on facial emotion recognition deficits, symptoms and functioning in patients with schizophrenia. *Acta Psychiatr Scand.* 2011;123:147–153.
51. Bhatia T, Agarwal A, Shah G, et al. Adjunctive cognitive remediation for schizophrenia using yoga: an open, non-randomized trial. *Acta Neuropsychiatr.* 2012;24:91–100.
52. Centorrino F, Wurtman JJ, Duca KA, et al. Weight loss in overweight patients maintained on atypical antipsychotic agents. *Int J Obes (Lond).* 2006;30:1011–1016.
53. Chéreau-Boudet I, Chareyron G, Blanc O, Charpeaud T, Duclos M, Llorca P-M. Interests of a program of physical activity in patients with schizophrenia: A pilot study. *Eur Psychiatry.* 2013;28.

54. Daumit GL, Dalcin AT, Jerome GJ, et al. A behavioral weight-loss intervention for persons with serious mental illness in psychiatric rehabilitation centers. *Int J Obes (Lond)*. 2011;35:1114–1123.
55. Dodd KJ, Duffy S, Stewart JA, Impey J, Taylor N. A small group aerobic exercise programme that reduces body weight is feasible in adults with severe chronic schizophrenia: a pilot study. *Disabil Rehabil*. 2011;33:1222–1229.
56. Duraiswamy G, Thirthalli J, Nagendra HR, Gangadhar BN. Yoga therapy as an add-on treatment in the management of patients with schizophrenia—a randomized controlled trial. *Acta Psychiatr Scand*. 2007;116:226–232.
57. Falkai P, Malchow B, Wobrock T, et al. The effect of aerobic exercise on cortical architecture in patients with chronic schizophrenia: a randomized controlled MRI study. *Eur Arch Psychiatry Clin Neurosci*. 2013;263:469–473.
58. Faulkner G, Sparkes A. Exercise as therapy for schizophrenia: An ethnographic study. *J Sport Exerc Psychol*. 1999;21:52–69.
59. Gholipour A, Abolghasemi SH, Gholinia K, Taheri S. Token reinforcement therapeutic approach is more effective than exercise for controlling negative symptoms of schizophrenic patients: a randomized controlled trial. *Int J Prev Med*. 2012;3:466–470.
60. Gomes E, Bastos T, Probst M, Ribeiro JC, Silva G, Corredeira R. Effects of a group physical activity program on physical fitness and quality of life in individuals with schizophrenia. *Ment Health Phys Act*. 2014;7:155–162. doi:10.1016/j.mhpa.2014.07.002.
61. Heggelund J, Nilsberg GE, Hoff J, Morken G, Helgerud J. Effects of high aerobic intensity training in patients with schizophrenia: a controlled trial. *Nord J Psychiatry*. 2011;65:269–275.
62. Heggelund J, Morken G, Helgerud J, Nilsberg GE, Hoff J. Therapeutic effects of maximal strength training on walking efficiency in patients with schizophrenia - a pilot study. *BMC Res Notes*. 2012;5:344.
63. Heggelund J, Kleppe KD, Morken G, Vedul-Kjelsås E. High aerobic intensity training and psychological States in patients with depression or schizophrenia. *Front Psychiatry*. 2014;5:148.
64. Hu Q-L, Xue L-H, Gao X-H. Effect of music-sport therapy on the insight and behavioral disturbance in patients with schizophrenia. *Chinese J Clin Rehabil*. 2004;8:1626–1627.
65. Ikai S, Uchida H, Suzuki T, Tsunoda K, Mimura M, Fujii Y. Effects of yoga therapy on postural stability in patients with schizophrenia-spectrum disorders: a single-blind randomized controlled trial. *J Psychiatr Res*. 2013;47:1744–1750.
66. Kaltsatou A, Kouidi E, Fountoulakis K, et al. Effects of exercise training with traditional dancing on functional capacity and quality of life in patients with schizophrenia: a randomized controlled study. *Clin Rehabil*. 2015;29:882–891.
67. Kim CH, Roh D, Chang JG, Lee HB. P.3.f.025 The effect of exercise therapy with motivational intervention in patients with schizophrenia. *Eur Neuropsychopharmacol*. 2013;23:S506. doi:10.1016/S0924-977X(13)70803-4.
68. Kim HJ, Song BK, So B, Lee O, Song W, Kim Y. Increase of circulating BDNF levels and its relation to improvement of physical fitness following 12 weeks of combined exercise in chronic patients with schizophrenia: a pilot study. *Psychiatry Res*. 2014;220:792–796.
69. Kimhy D, Vakhrusheva J, Bartels MN, et al. Aerobic fitness and body mass index in individuals with schizophrenia: implications for neurocognition and daily functioning. *Psychiatry Res*. 2014;220:784–791.
70. Kimhy D, Vakhrusheva J, Bartels MN, et al. The Impact of Aerobic Exercise on Brain-Derived Neurotrophic Factor and Neurocognition in Individuals With Schizophrenia: a Single-Blind, Randomized Clinical Trial. *Schizophr Bull*. 2015;41:859–868.
71. Kuo FC, Lee CH, Hsieh CH, Kuo P, Chen YC, Hung YJ. Lifestyle modification and behavior therapy effectively reduce body weight and increase serum level of brain-derived neurotrophic factor in obese non-diabetic patients with schizophrenia. *Psychiatry Res*. 2013;209:150–154.
72. Lin J, Lam M, Chiu C, et al. The impacts of yoga and exercise on neuro- Cognitive function and symptoms in early psychosis. *Schizophr Bull*. 2011;37:171.
73. Malchow B, Schnur M, Pajonk F-GB, Falkai P. No effect of aerobic exercise on the amygdala and vermis cerebelli in patients with chronic schizophrenia. *Eur Arch Psychiatry Clin Neurosci*. 2011;261:S98.
74. Malchow B, Keller K, Hasan A, et al. Effects of endurance training combined with cognitive remediation on everyday functioning, symptoms, and cognition in multipisode schizophrenia patients. *Schizophr Bull*. 2015;41:847–858.
75. Malchow B, Keeser D, Keller K, et al. Effects of endurance training on brain structures in chronic schizophrenia patients and healthy controls [published online ahead of print January 23, 2015]. *Schizophr Res*. 2015;1–10. doi:10.1016/j.schres.2015.01.005.
76. Manjunath RB, Varambally S, Thirthalli J, Basavaraddi IV, Gangadhar BN. Efficacy of yoga as an add-on treatment for in-patients with functional psychotic disorder. *Indian J Psychiatry*. 2013;55:S374–S378.
77. Margariti A, Ktonas P, Hondraki P, et al. An application of the Primitive Expression form of dance therapy in a psychiatric population. *Arts Psychother*. 2012;39:95–101. doi:10.1016/j.aip.2012.01.001.
78. Marzolini S, Jensen B, Melville P. Feasibility and effects of a group-based resistance and aerobic exercise program for individuals with severe schizophrenia: a multidisciplinary approach. *Ment Health Phys Act*. 2009;2:29–36. doi:10.1016/j.mhpa.2008.11.001.
79. Oertel-Knöchel V, Mehler P, Thiel C, et al. Effects of aerobic exercise on cognitive performance and individual psychopathology in depressive and schizophrenia patients. *Eur Arch Psychiatry Clin Neurosci*. 2014;1–16. doi:10.1007/s00406-014-0485-9.
80. Paikkatt B, Singh AR, Singh PK, Jahan M. Efficacy of yoga therapy on subjective well-being and basic living skills of patients having chronic schizophrenia. *Ind Psychiatry J*. 2012;21:109–114.
81. Pajonk FG, Wobrock T, Gruber O, et al. Hippocampal plasticity in response to exercise in schizophrenia. *Arch Gen Psychiatry*. 2010;67:133–143.
82. Poulin MJ, Chaput JP, Simard V, et al. Management of antipsychotic-induced weight gain: prospective naturalistic study of the effectiveness of a supervised exercise programme. *Aust NZ J Psychiatry*. 2007;41:980–989.
83. Rosenbaum S, Lagopoulos J, Curtis J, et al. Aerobic exercise intervention in young people with schizophrenia spectrum disorders; improved fitness with no change in hippocampal volume. *Psychiatry Res Neuroimaging*. 2015;232:200–201. doi:10.1016/j.psychres.2015.02.004.
84. Scheewe TW, van Haren NEM, Sarkisyan G, et al. Exercise therapy, cardiorespiratory fitness and their effect on brain volumes: A randomised controlled trial in patients with schizophrenia and healthy controls. *Eur Neuropsychopharmacol*. 2012;c:675–685. doi:10.1016/j.euroneuro.2012.08.008.

85. Scheewe TW, Backx FJ, Takken T, et al. Exercise therapy improves mental and physical health in schizophrenia: a randomised controlled trial. *Acta Psychiatr Scand*. 2013;127:464–473.
86. Skrinar GS, Huxley NA, Hutchinson DS, Menninger E, Glew P. The role of a fitness intervention on people with serious psychiatric disabilities. *Psychiatr Rehabil J*. 2005;29:122–127.
87. Smith RC, Boules S, Maayan L., et al. Effects of yoga on cognition, glucocorticoid receptor, psychiatric symptoms, weight and metabolic changes in chronic schizophrenic patients. *Schizophr Bull*. 2013;39:S275.
88. Strassnig MT, Newcomer JW, Harvey PD. Exercise improves physical capacity in obese patients with schizophrenia: pilot study. *Schizophr Res*. 2012;141:284–285.
89. Svatkova A, Mandl RC, Scheewe TW, Cahn W, Kahn RS, Hulshoff Pol HE. Physical Exercise Keeps the Brain Connected: Biking Increases White Matter Integrity in Patients With Schizophrenia and Healthy Controls. *Schizophr Bull*. 2015;41:869–878.
90. Takahashi H, Sassa T, Shibuya T, et al. Effects of sports participation on psychiatric symptoms and brain activations during sports observation in schizophrenia. *Transl Psychiatry*. 2012;2:e96.
91. Tang FLW, Lam MMY, Chau RMW, Cheung KKW, Ko EYC. Move the body, work the mind? The impact of body movement on patients with schizophrenia. *East Asian Arch Psychiatry*. 2010;20:68–69.
92. Ulloa RE, Apiquian R, Calle P, et al. Efficacy of the guidelines for diagnosis and treatment of adolescents with schizophrenia: A comparative study vs usual treatment. *Schizophr Bull*. 2013;39:S355.
93. Vancampfort D, De Hert M, Knapen J, et al. State anxiety, psychological stress an positive well-being responses to yoga and aerobic exercise in people with schizophrenia: a pilot study. *Disabil Rehabil*. 2011;33:684–689.
94. Varambally S, Gangadhar BN, Thirthalli J, et al. Therapeutic efficacy of add-on yogasana intervention in stabilized outpatient schizophrenia: Randomized controlled comparison with exercise and waitlist. *Indian J Psychiatry*. 2012;54:227–232.
95. Ventura J, Gretchen-Doorly D, Subotnik KL, Vinogradov S, Nahum M, Nuechterlein KH. Combining cognitive training and exercise to improve cognition and functional outcomes in the early course of schizophrenia: A pilot study. *Schizophr Bull*. 2013;39:S309–S310.
96. Visceglia E, Lewis S. Yoga therapy as an adjunctive treatment for schizophrenia: a randomized, controlled pilot study. *J Altern Complement Med*. 2011;17:601–607.
97. Warren KR, Ball MP, Feldman S, Liu F, McMahon RP, Kelly DL. Exercise program adherence using a 5-kilometer (5K) event as an achievable goal in people with schizophrenia. *Biol Res Nurs*. 2011;13:383–390.
98. Zwick S, Brunbauer A, Laux G. P03-155 - Effects of aerobic endurance training on neurocognitive functions in schizophrenic inpatients. *Eur Psychiatry*. 2010;25:1136. doi:10.1016/S0924-9338(10)71125-1.
99. Chan C. The long-term effects of yoga and aerobic exercise on cognitive function and clinical symptoms in early psychosis: a follow-up randomized control trial. *HKU Theses Online*. 2014:1–49.
100. Leone M, Lalande D, Thériault L, Kalinova É, Fortin A. Impact of an exercise program on the physiologic, biologic and psychologic profiles in patients with schizophrenia. *Schizophr Res*. 2015;164:270–272.
101. Kim BJ, Jin S. The Effects of Aerobic Exercise Program on BMI, Mood States, Psychiatric Symptoms in Male Patients with Chronic Schizophrenia. 2015;24:12–21.
102. Nath B, Baruah A, Ahmed N. A study to assess the effectiveness of planned exercise programme in patients with schizophrenia. *Open J Psychiatry Allied Sci*. 2015;6:28–34.
103. Strassnig MT, Signorile JF, Potiaumpai M, et al. High velocity circuit resistance training improves cognition, psychiatric symptoms and neuromuscular performance in overweight outpatients with severe mental illness. *Psychiatry Res*. 2015;229:295–301.
104. Vancampfort D, Guelinckx H, Probst M, et al. Health-related quality of life and aerobic fitness in people with schizophrenia. *Int J Ment Health Nurs*. 2015;24:394–402. doi:10.1111/inm.12145.
105. Wu MH, Lee CP, Hsu SC, Chang CM, Chen CY. Effectiveness of high-intensity interval training on the mental and physical health of people with chronic schizophrenia. *Neuropsychiatr Dis Treat*. 2015;11:1255–1263.
106. Herbener ES, Harrow M. Are negative symptoms associated with functioning deficits in both schizophrenia and nonschizophrenia patients? A 10-year longitudinal analysis. *Schizophr Bull*. 2004;30:813–825.
107. Fervaha G, Foussias G, Agid O, Remington G. Impact of primary negative symptoms on functional outcomes in schizophrenia. *Eur Psychiatry*. 2014;29:449–455.
108. Lin CH, Huang CL, Chang YC, et al. Clinical symptoms, mainly negative symptoms, mediate the influence of neurocognition and social cognition on functional outcome of schizophrenia. *Schizophr Res*. 2013;146:231–237. doi:10.1016/j.schres.2013.02.009.
109. Soundy A, Roskell C, Stubbs B, Probst M, Vancampfort D. Investigating the benefits of sport participation for individuals with schizophrenia: a systematic review. *Psychiatr Danub*. 2015;27:2–13.
110. Gorczynski P, Faulkner G. Exercise therapy for schizophrenia. *Cochrane Database Syst Rev*. 2010; Issue 5. Art. No.: CD004412. doi:10.1002/14651858.CD004412.pub2.
111. Vancampfort D, Probst M, Helvik Skjaerven L, et al. Systematic review of the benefits of physical therapy within a multidisciplinary care approach for people with schizophrenia. *Phys Ther*. 2012;92:11–23.
112. Stanton R, Happell B. A systematic review of the aerobic exercise program variables for people with schizophrenia. *Curr Sports Med Rep*. 2014;13:260–266.
113. Garber CE, Blissmer B, Deschenes MR, et al.; American College of Sports Medicine. American College of Sports Medicine position stand. Quantity and quality of exercise for developing and maintaining cardiorespiratory, musculoskeletal, and neuromotor fitness in apparently healthy adults: guidance for prescribing exercise. *Med Sci Sports Exerc*. 2011;43:1334–1359.
114. Firth J, Cotter J, Elliott R, French P, Yung AR. A systematic review and meta-analysis of exercise interventions in schizophrenia patients. *Psychol Med*. 2015;45:1343–1361.
115. Alexandratos K, Barnett F, Thomas Y. The impact of exercise on the mental health and quality of life of people with severe mental illness: A critical review. *Br J Occup Ther*. 2012;75:48–60. doi:10.4276/030802212X13286281650956.
116. Hofer A, Rettenbacher MA, Widschwendter CG, Kemmler G, Hummer M, Fleischhacker WW. Correlates of subjective and functional outcomes in outpatient clinic attendees with schizophrenia and schizoaffective disorder. *Eur Arch Psychiatry Clin Neurosci*. 2006;256:246–255.
117. Woon PS, Chia MY, Chan WY, Sim K. Neurocognitive, clinical and functional correlates of subjective quality of life in Asian



- outpatients with schizophrenia. *Prog Neuropsychopharmacol Biol Psychiatry*. 2010;34:463–468.
118. Suttajit S, Arunpongpaisal S, Srisurapanont M, et al. Psychosocial functioning in schizophrenia: are some symptoms or demographic characteristics predictors across the functioning domains? *Neuropsychiatr Dis Treat*. 2015;11:2471–2477.
  119. Fitzgerald PB, Williams CL, Corteling N, et al. Subject and observer-rated quality of life in schizophrenia. *Acta Psychiatr Scand*. 2001;103:387–392.
  120. Savilla K, Kettler L, Galletly C. Relationships between cognitive deficits, symptoms and quality of life in schizophrenia. *Aust NZJ Psychiatry*. 2008;42:496–504.
  121. Ritsner MS. Predicting quality of life impairment in chronic schizophrenia from cognitive variables. *Qual Life Res*. 2007;16:929–937.
  122. Cichocki L, Cechnicki A, Franczyk-Glita J, Bładziński P, Kalisz A, Wroński K. Quality of life in a 20-year follow-up study of people suffering from schizophrenia. *Compr Psychiatry*. 2015;56:133–140.
  123. Vancampfort D, Probst M, Scheewe T, et al. Lack of physical activity during leisure time contributes to an impaired health related quality of life in patients with schizophrenia. *Schizophr Res*. 2011;129:122–127.
  124. Rosenbaum S, Tiedemann A, Sherrington C, Curtis J, Ward PB. Physical activity interventions for people with mental illness: a systematic review and meta-analysis. *J Clin Psychiatry*. 2014;75:964–974.
  125. Siris SG. Reviews and overviews depression in schizophrenia : perspective in the era of “atypical.” *Antipsychotic Agents*. 2000;1379–1389.
  126. Bosanac P, Castle DJ. Schizophrenia and depression. *Med J Aust*. 2013;199:S36–S39.
  127. Nakajima S, Takeuchi H, Fervaha G, et al. Comparative efficacy between clozapine and other atypical antipsychotics on depressive symptoms in patients with schizophrenia: analysis of the CATIE phase 2E data. *Schizophr Res*. 2015;161:429–433. doi:10.1016/j.schres.2014.12.024.
  128. Hötting K, Röder B. Beneficial effects of physical exercise on neuroplasticity and cognition. *Neurosci Biobehav Rev*. 2013;37:2243–2257.
  129. Hayes SM, Forman DE, Verfaellie M. Cardiorespiratory fitness is associated with cognitive performance in older but not younger adults [published online ahead of print December 20, 2014]. *J Gerontol B Psychol Sci Soc Sci*. 2014;1–8. doi:10.1093/geronb/gbu167.
  130. Vöhringer PA, Barroilhet SA, Amerio A, et al. Cognitive impairment in bipolar disorder and schizophrenia: a systematic review. *Front Psychiatry*. 2013;4:87.
  131. Carrión RE, McLaughlin D, Auther AM, Olsen R, Correll CU, Cornblatt BA. The impact of psychosis on the course of cognition: a prospective, nested case-control study in individuals at clinical high-risk for psychosis [published online ahead of print July 14, 2015]. *Psychol Med*. 2015:1–14. doi:10.1017/S0033291715001233.
  132. Fusar-Poli P, Deste G, Smieskova R, et al. Cognitive functioning in prodromal psychosis: a meta-analysis. *Arch Gen Psychiatry*. 2012;69:562–571.
  133. Callahan PM, Terry AV Jr. Attention. *Handb Exp Pharmacol*. 2015;228:161–189.
  134. Talpos J, Shoaib M. Executive function. *Handb Exp Pharmacol*. 2015;228:191–213.
  135. Best JR, Miller PH. A developmental perspective on executive function. *Child Dev*. 2010;81:1641–1660.
  136. Zhang XY, Liang J, Chen da C, et al. Low BDNF is associated with cognitive impairment in chronic patients with schizophrenia. *Psychopharmacology (Berl)*. 2012;222:277–284.
  137. Li YK, Hui CL, Lee EH, et al. Coupling physical exercise with dietary glucose supplement for treating cognitive impairment in schizophrenia: a theoretical model and future directions. *Early Interv Psychiatry*. 2014;8:209–220.
  138. Huang T, Larsen KT, Ried-Larsen M, Møller NC, Andersen LB. The effects of physical activity and exercise on brain-derived neurotrophic factor in healthy humans: A review. *Scand J Med Sci Sports*. 2014;24:1–10.
  139. Voss MW, Prakash RS, Erickson KI, et al. Plasticity of brain networks in a randomized intervention trial of exercise training in older adults. *Front Aging Neurosci*. 2010;2:1–17.
  140. Andel R, Crowe M, Pedersen NL, Fratiglioni L, Johansson B, Gatz M. Physical exercise at midlife and risk of dementia three decades later: a population-based study of Swedish twins. *J Gerontol A Biol Sci Med Sci*. 2008;63:62–66.
  141. Lautenschlager NT, Cox KL, Flicker L, et al. Effect of physical activity on cognitive function in older adults at risk for Alzheimer disease: a randomized trial. *JAMA*. 2008;300:1027–1037.
  142. Vreeker A, van Bergen AH, Kahn RS. Cognitive enhancing agents in schizophrenia and bipolar disorder. *Eur Neuropsychopharmacol*. 2015;25:969–1002.
  143. Faulkner G, Cohn T, Remington G. Validation of a physical activity assessment tool for individuals with schizophrenia. *Schizophr Res*. 2006;82:225–231. doi:10.1016/j.schres.2005.10.020.
  144. Leutwyler H, Hubbard EM, Jeste DV, Vinogradov S. “We’re not just sitting on the periphery”: a staff perspective of physical activity in older adults with schizophrenia. *Gerontologist*. 2013;53:474–483.
  145. Beebe LH, Smith K, Burk R, et al. Effect of a motivational intervention on exercise behavior in persons with schizophrenia spectrum disorders. *Community Ment Health J*. 2011;47:628–636.
  146. Bassilios B, Judd F, Pattison P, Nicholas A, Moeller-Saxone K. Predictors of exercise in individuals with schizophrenia: A test of the transtheoretical model of behavior change. *Clin Schizophr Relat Psychoses*. 2015;8:173–182A.
  147. Foussias G, Siddiqui I, Fervaha G, et al. Motivated to do well: an examination of the relationships between motivation, effort, and cognitive performance in schizophrenia. *Schizophr Res*. 2015;166:276–282.
  148. Vancampfort D, De Hert M, Stubbs B, et al. Negative symptoms are associated with lower autonomous motivation towards physical activity in people with schizophrenia. *Compr Psychiatry*. 2015;56:128–132.
  149. Vancampfort D, Vansteenkiste M, De Hert M, et al. Self-determination and stage of readiness to change physical activity behaviour in schizophrenia. *Ment Health Phys Act*. 2014;7:171–176. doi:10.1016/j.mhpa.2014.06.003.
  150. Nakagami E, Xie B, Hoe M, Brekke JS. Intrinsic motivation, neurocognition and psychosocial functioning in schizophrenia: testing mediator and moderator effects. *Schizophr Res*. 2008;105:95–104.
  151. Kleinginna Jr PR, Kleinginna AM. A categorized list of motivation definitions, with a suggestion for a consensual definition. *Motiv Emot*. 1981;5:263–291.
  152. Gard DE, Sanchez AH, Starr J, et al. Using self-determination theory to understand motivation deficits in schizophrenia: the ‘why’ of motivated behavior. *Schizophr Res*. 2014;156:217–222.
